# Supplementary material
Source: PubMed Central journal article supplement (PMC3926507)

**SUPPLEMENTAL FIGURE S1**

**A**

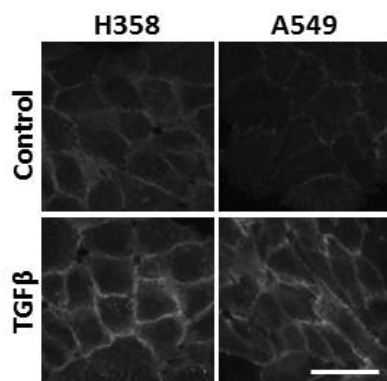

**B**

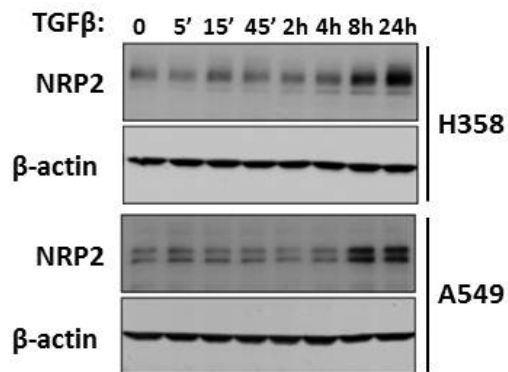

**C**

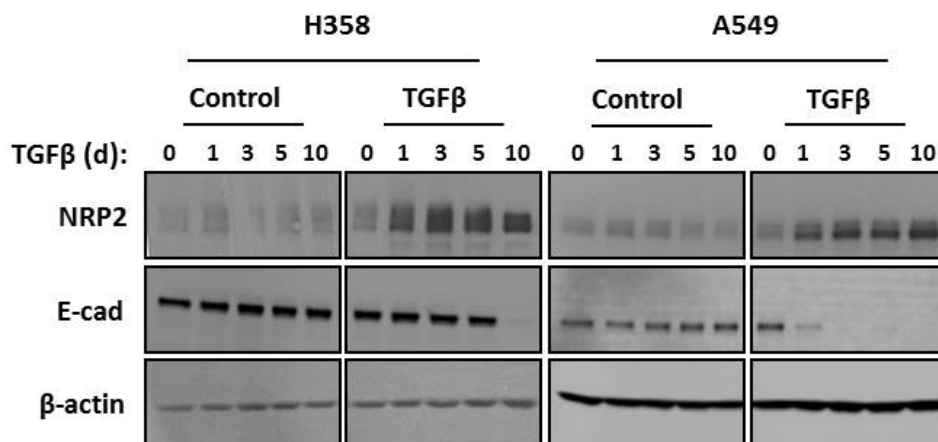

**D**

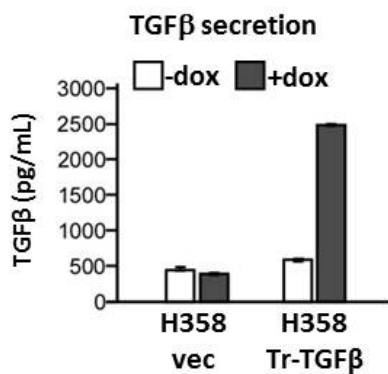

E

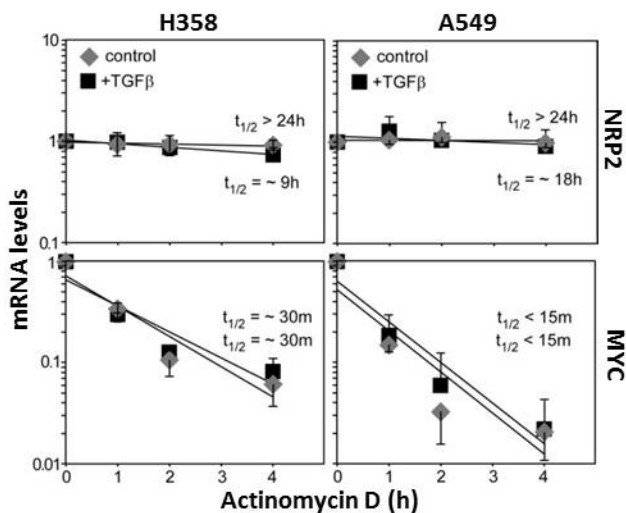

F

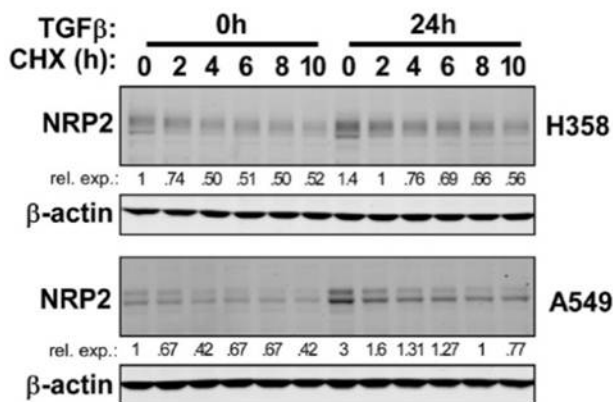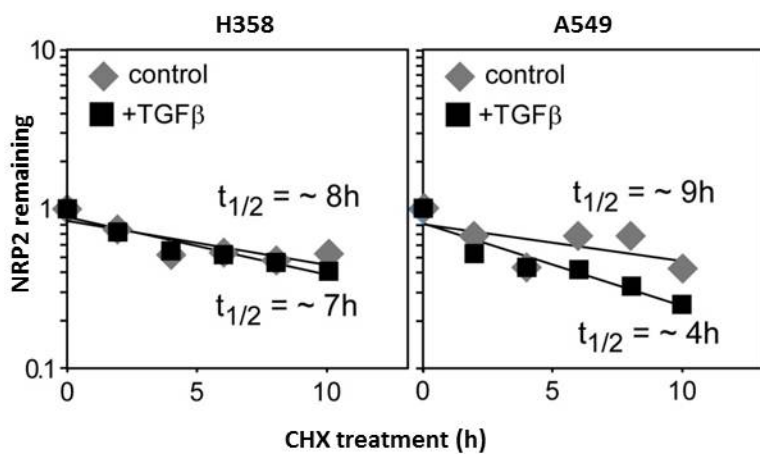

**SUPPLEMENTAL FIGURE S2**

**A**

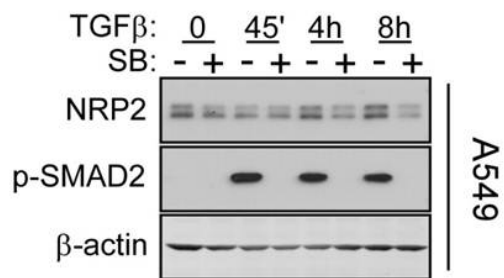

**B**

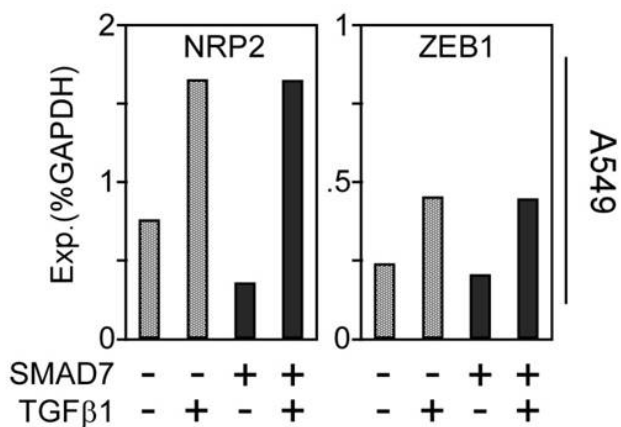

**C**

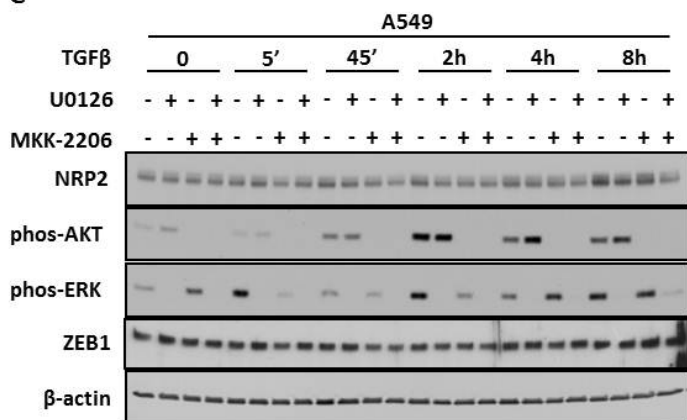

**E**

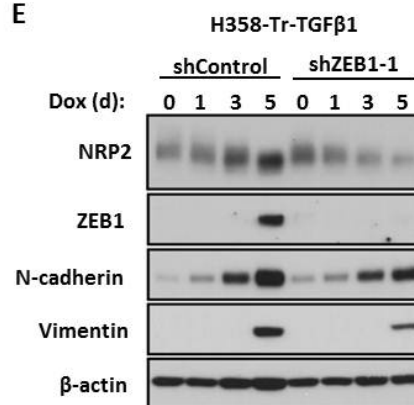

**D**

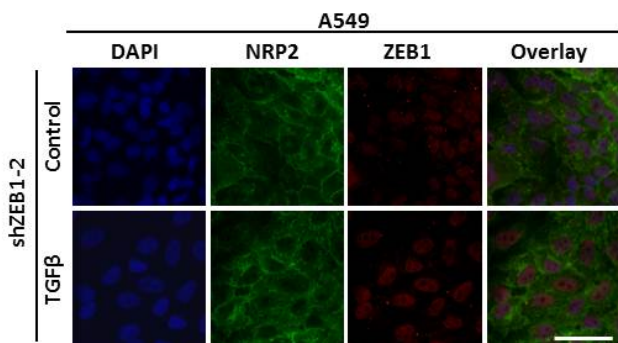

# SUPPLEMENTAL FIGURE S3

**A**

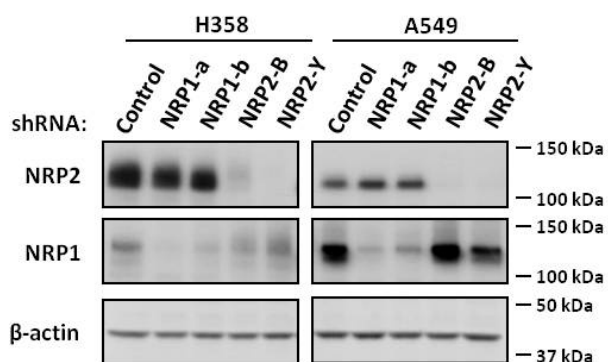

**B**

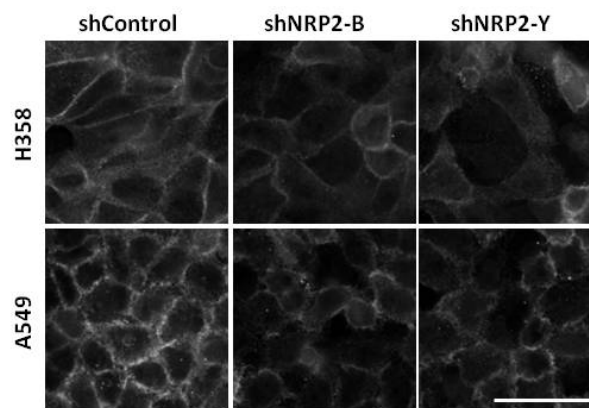

**C**

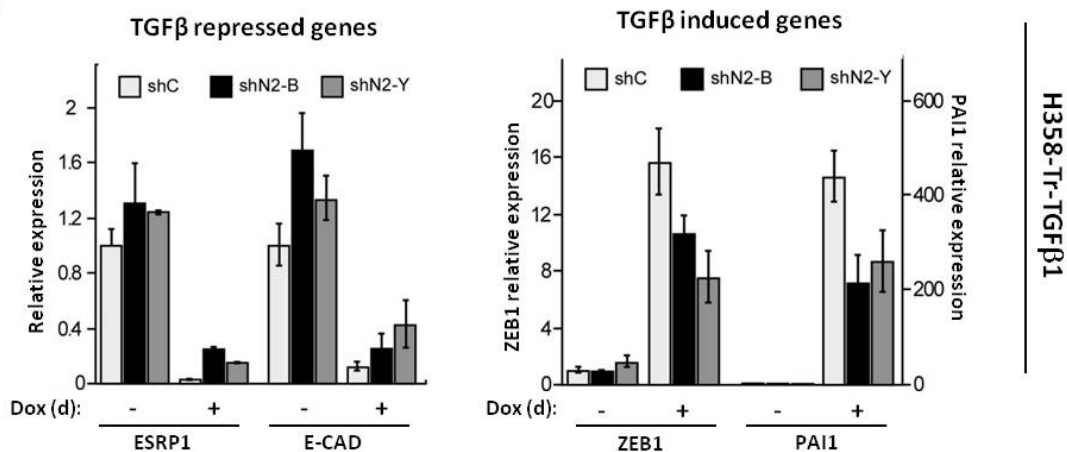

**D**

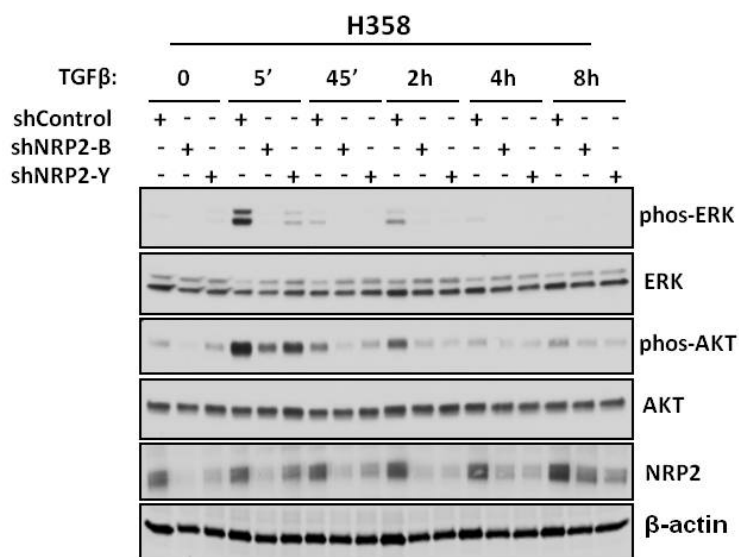

E

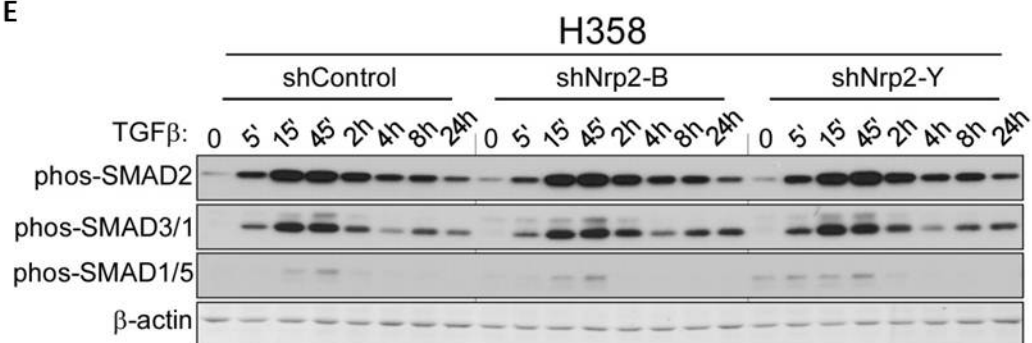

F

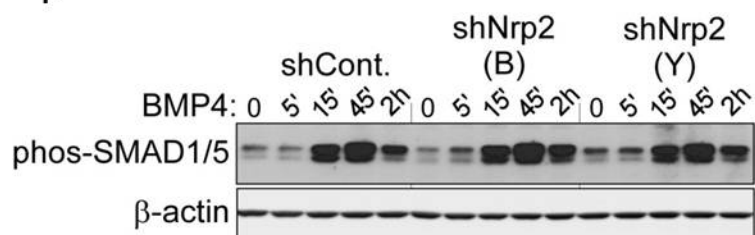

G

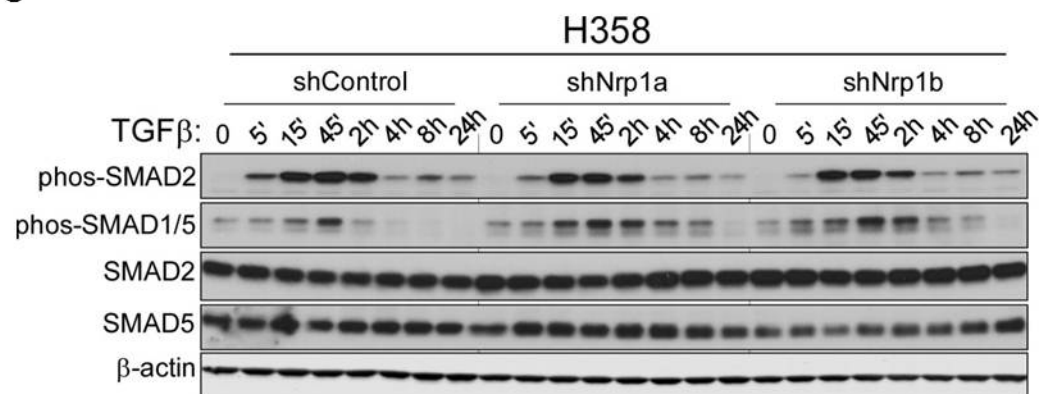

**SUPPLEMENTAL FIGURE S4**

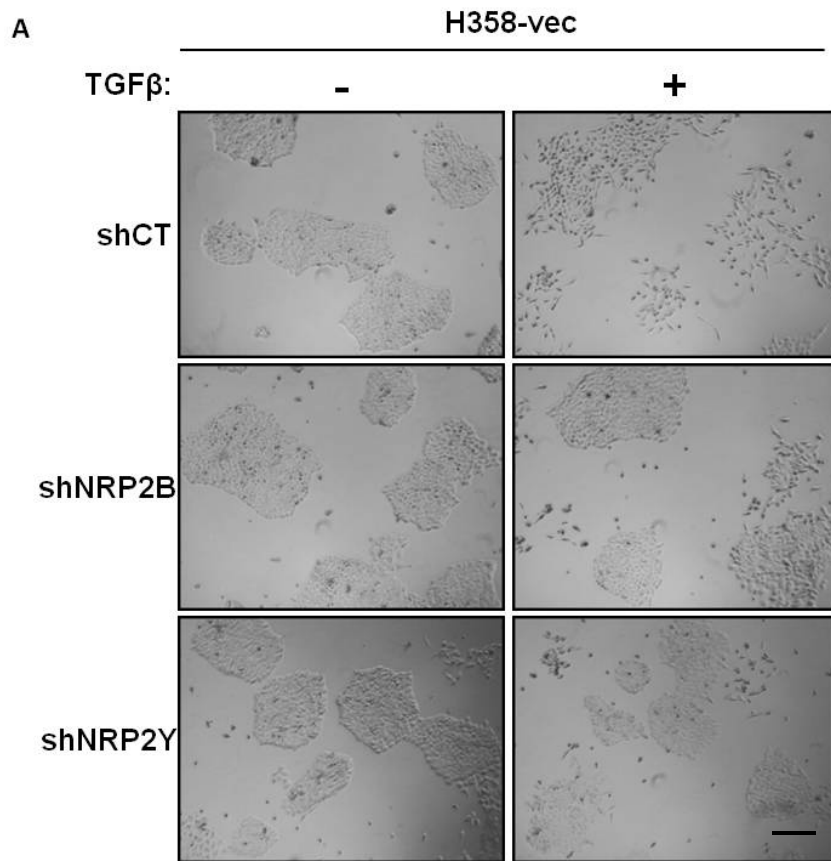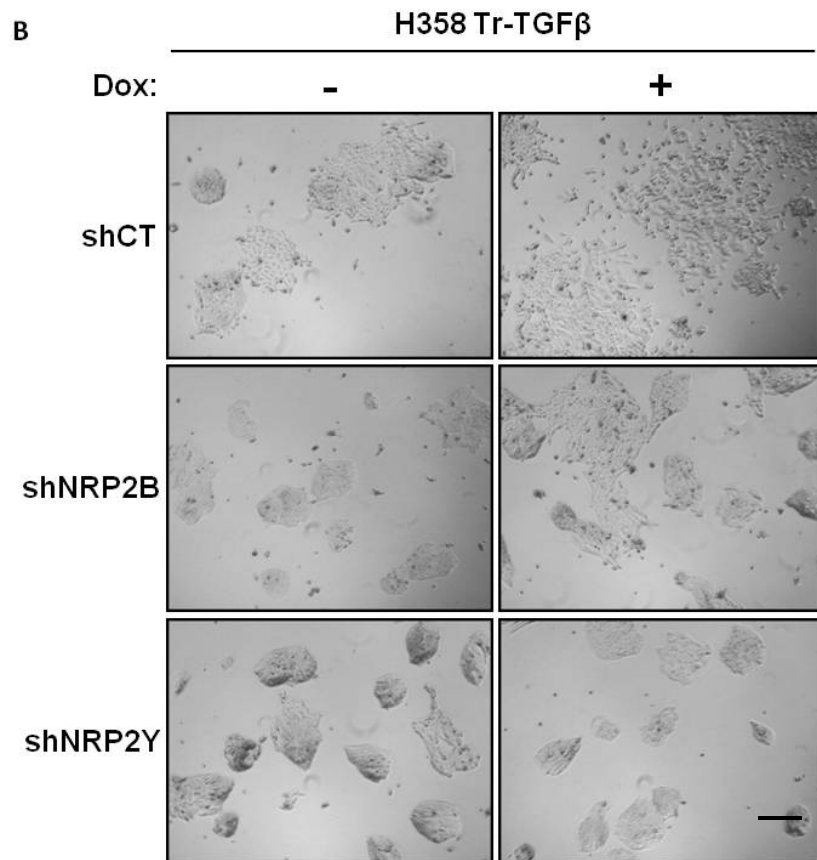



**SUPPLEMENTAL FIGURE S5**

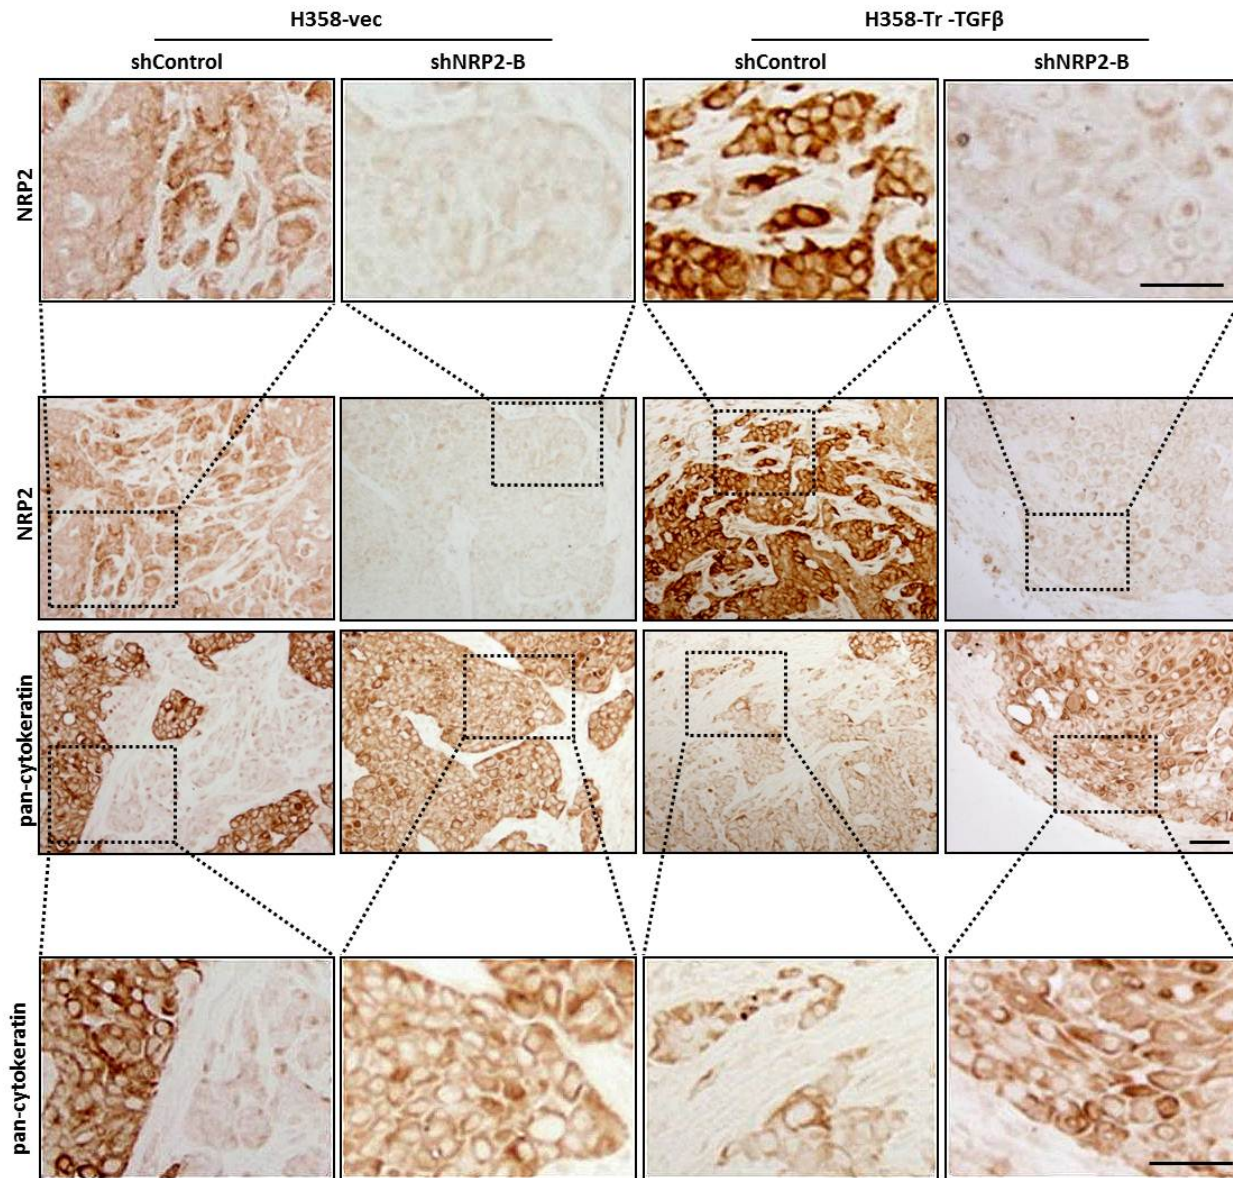

**SUPPLEMENTAL FIGURE S6**

**E-cadherin**

**NRP2**

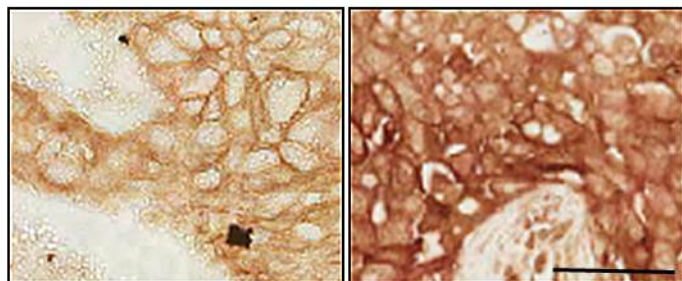



**SUPPLEMENTAL FIGURE S7**

**A**

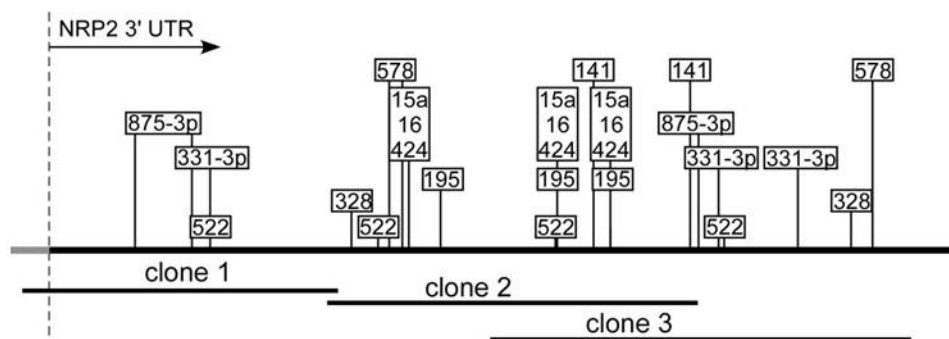

**B**

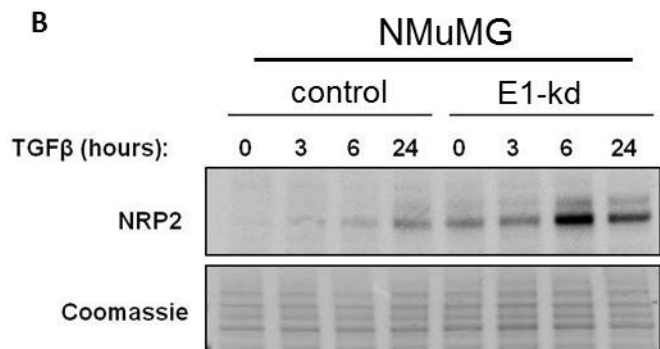

Supplement: NIHMS532138-supplement-2.pdf [file NIHMS532138-supplement-2.pdf]
